# Supplementary material for: The quantity of CD40 signaling determines the differentiation of B cells into functionally distinct memory cell subsets
Source: eLife. 2019 Jun 21;8:e44245. doi: 10.7554/eLife.44245 (PMC6636905; doi:10.7554/eLife.44245)
Supplement: Figure 1—source data 1. [file elife-44245-fig1-data1.xlsx]

## Sheet: b
GL7- CD138+ (%)				GL7+ CD138- (%)
IgG1+		IgG1-		IgG1+		IgG1-
CD80 hi	CD80lo	CD80 hi	CD80lo	CD80 hi	CD80lo	CD80 hi	CD80lo
11.6	4.65	26.3	0.82	58.9	77	57.7	85.2
16.1	0.74	37.1	7.21	55.2	74.2	44.3	87.4
18.3	0	10	0	57.4	81.9	70	93.5
19.8	7.14	15.1	3.15	51.3	63.3	51.5	64.9
15.9	8.83	11.7	2.34	48.5	64.7	58.1	71.9
13.9	4.4	13.1	2.11	53.5	67	55.8	70.1

## Sheet: d
CD80 hi %		CD80 lo %		CD80 hi #		CD80 lo #
WT	KO	WT	KO	WT	KO	WT	KO
80.9	46.2	19.1	53.8	12491	1718	2949	2001
88.5	58.2	11.4	41.8	22704	1252	2925	899
86.3	62	13.6	38	22660	1067	3571	654
92	64.3	7.87	35	18652	2041	1596	1111
95.7	69.1	4.29	30.9	7791	1784	349	798
91.4	71.9	8.27	28.1	9582	2231	867	872
90.7	59.1	9.18	40.9	16025	923	1622	639
93.6	47.4	6.4	52.6	12392	568	847	630
