# Supplementary material for: The quantity of CD40 signaling determines the differentiation of B cells into functionally distinct memory cell subsets
Source: eLife. 2019 Jun 21;8:e44245. doi: 10.7554/eLife.44245 (PMC6636905; doi:10.7554/eLife.44245)
Supplement: Figure 2—source data 1. [file elife-44245-fig2-data1.xlsx]

## Sheet: b
WT	KO
12396	310
1649	434
14447	340
9217	508
14021	87
14732	82
7851	163

## Sheet: d
day 10								6 wks
CD80 hi %		CD80 lo %		CD80 hi #		CD80 lo #		CD80 hi %		CD80 lo %		CD80 hi #		CD80 lo #
ctrl IgG	anti-CD40L	ctrl IgG	anti-CD40L	ctrl IgG	anti-CD40L	ctrl IgG	anti-CD40L	ctrl IgG	anti-CD40L	ctrl IgG	anti-CD40L	ctrl IgG	anti-CD40L	ctrl IgG	anti-CD40L
63.5	41.9	36.1	58.1	12338	1128	7014	1564	78.1	74.3	20.8	23.9	727	6247	91	2953
58.3	42.5	41	57.8	11419	1599	8030	2174	83.8	73.2	15.1	25.6	11521	584	1310	234
69	50	30.4	50	12383	1372	5456	1372	80.8	74.2	17.4	24.3	11429	6871	1941	1991
65	49.6	34.2	49.6	5390	634	2836	634	77.2	62.2	22	35.1	6644	7970	788	1906
57.6	50.3	41.4	49.7	6545	1781	4704	1760	88.9	67.9	11.1	32.1	21615	5700	5757	1833
63.9	40.8	36.1	59.2	19828	2869	11202	4163	89.7	71.4	10.2	28.6	23870	5270	4301	1843
58.4	31.8	40.7	68.2	15545	2192	10833	4702	85.4	77.3	14.5	22.4	15000	10674	3230	2496
66.4	44.9	32.8	53.9	18608	4143	9192	4974	89.4	80.7	10.6	19.3	12769	4443	3639	2507
54.7	41.8	45.3	58.2	8479	3214	7021	4475

## Sheet: f
CD80 hi %		CD80 lo %		CD80 hi #		CD80 lo #		GC #		CD138+ #
PBS	anti-CD40	PBS	anti-CD40	PBS	anti-CD40	PBS	anti-CD40	PBS	anti-CD40	PBS	anti-CD40
64.6	85.5	35.2	13.7	9888	16488	5388	2642	563190	391162	124475	30300
54.2	91.8	44.4	7.23	1227	16204	1005	1276	113328	177117	26363	17078
56.9	86.9	43.1	12.1	3536	21690	2679	3020	150100	613177	41411	82175
51.8	91.3	46.8	7.98	1068	7896	965	690	91944	157208	15440	24223
60.6	87.7	39.1	11.3	5281	17405	3407	2243	369214	189193	97466	30716

## Sheet: i
CD80 hi %		CD80 lo %
shCtrl	shCd40lg	shCtrl	shCd40lg
50.5	50.1	49.5	49.9
65.1	50	34.9	50
67.6	48	32.4	52.3
62.1	56.8	37.8	41
64.6	54.7	34.2	43.2
60.2	50.9	38.3	46.7
62.9	59.5	35	37.7
59.2		38.9
