# Supplementary material for: The quantity of CD40 signaling determines the differentiation of B cells into functionally distinct memory cell subsets
Source: eLife. 2019 Jun 21;8:e44245. doi: 10.7554/eLife.44245 (PMC6636905; doi:10.7554/eLife.44245)
Supplement: Figure 3—source data 1. [file elife-44245-fig3-data1.xlsx]

## Sheet: b
day	lo			mid			hi
0	1.155	1.15	1.169	1.155	1.15	1.169	1.155	1.15	1.169
1	3.644	3.295	3.394	5.177	4.531	4.951	6.095	5.695	5.606
2	6.819	6.776	6.407	27.29	27.07	23.83	41.23	42.36	41.03
3	7.988	7.139	6.372	32.98	34.47	32.8	51.16	50.52	52.43
4	5.646	5.578	5.67	33.56	38.22	39.82	48.31	50.23	52.65

## Sheet: e
IgG1-												IgG1+
CD80 hi %			CD80 lo %			CD80 hi #			CD80 lo #			CD80 hi %			CD80 lo %			CD80 hi #			CD80 lo #
lo	mid	hi	lo	mid	hi	lo	mid	hi	lo	mid	hi	lo	mid	hi	lo	mid	hi	lo	mid	hi	lo	mid	hi
36.5	79.8	92.2	63.4	20	7.73	302426	475375	1101745	525310	119142	92370	41.2	79.9	90	58.4	19.8	8.91	252446	681954	1022690	357836	168995	100244
29.8	76.6	92.2	70	23.4	7.71	147277	208705	1349508	345953	63756	112849	36	76.9	91.4	63.7	23	8.63	125213	308304	1456088	221558	92211	137484
31.6	81.4	88.6	68.2	18.5	11.3	243108	358377	986172	524681	81449	125776	36.6	81.9	88.7	63	17.9	11.4	188659	495366	971552	324741	108267	124867
31.5	79.2	90.9	68.4	20.7	9.01	391090	200645	904607	849223	52441	89665	35	80.1	89.1	64.4	19.7	10.7	264658	301851	883140	486970	74238	106056
28.5	77.8	89.2	71.3	22	10.7	71576	715493	1128752	179065	202325	135400	33.1	77.7	88.8	66.6	22	11	54865	1036660	1020164	110392	293520	126372
28.2	74.9	93.1	71	24.5	6.14	321378	434434	3156838	809142	142104	208195	47.1	82.5	94.6	51.8	17	4.97	176014	557565	3832018	193578	114892	201323
19.8	66	81.3	79.7	33.3	18.4	53618	563716	1079024	215826	284420	244207	34.3	81.8	88	64.6	17.1	11.7	52109	1058639	1939233	98141	221305	257830
15.2	78.6	87.6	84.5	21.2	11.8	77901	1277379	775077	433070	344535	104405	32	87.7	93.5	67.4	12	6.16	96457	2168889	1423744	203162	296769	93800
