# Supplementary material for: The quantity of CD40 signaling determines the differentiation of B cells into functionally distinct memory cell subsets
Source: eLife. 2019 Jun 21;8:e44245. doi: 10.7554/eLife.44245 (PMC6636905; doi:10.7554/eLife.44245)
Supplement: Figure 4—source data 1. [file elife-44245-fig4-data1.xlsx]

## Sheet: f
day 4				day 10
CD138-		CD138+		GC		Bmem
iMB-lo	iMB-hi	iMB-lo	iMB-hi	iMB-lo	iMB-hi	iMB-lo	iMB-hi
40.5	54.6	14.5	82.7	64.8	34.4	80	13.3
58.5	39.4	17.4	81.2	75.9	22	92.5	7.5
46.7	51.4	9.08	87	76.7	21.7	88.6	5.71
64	33.8	8.58	88.2	72.9	25.9	88.1	11.9
52.7	42.6	11	86.1	61.1	38.9	92.3	10.3
