# Supplementary material for: The quantity of CD40 signaling determines the differentiation of B cells into functionally distinct memory cell subsets
Source: eLife. 2019 Jun 21;8:e44245. doi: 10.7554/eLife.44245 (PMC6636905; doi:10.7554/eLife.44245)
Supplement: Figure 5—source data 1. [file elife-44245-fig5-data1.xlsx]

## Sheet: b
	OVA peptide (μM)
	0	0.2	1	5
CD40L (MFI)	14.5	36.1	124	274
	14.3	36.3	128	290
	14	37.4	127	290

## Sheet: c
	OVA peptide (μM)
	0	0.2	1	5
CD80 (MFI)	19.4	57.4	132	174
	18	64.5	113	184
	17.5	65.3	159	189

## Sheet: d
	ctrl IgG	anti-CD40L (μg/mL)
		0.2	2	20
CD80 (MFI)	179	108	74.8	54.4
	161	114	71.7	43.8
	141	126	76	48.9

## Sheet: f
CD80 hi %
B1-8hi	B1-8
67.6	42.8
75.8	56.1
65.5	39.6
60.3	44.1
60.6	45
60.1	48.9
55	36.7

## Sheet: h
CD80 hi %
NPmed hi	NPmed lo
75.4	39.8
80.4	39.3
79.3	46.2
83	43
77.2	40.7
67.6	36
61.1	47.4

## Sheet: j
CD80 hi %
NPmed hi	NPmed lo
71.8	47
61.8	53.6
66.5	44.5
54	41.8
57.4	41.4
56.9	46.6
56.5	43
57.6	45.7
