# Supplementary material for: The quantity of CD40 signaling determines the differentiation of B cells into functionally distinct memory cell subsets
Source: eLife. 2019 Jun 21;8:e44245. doi: 10.7554/eLife.44245 (PMC6636905; doi:10.7554/eLife.44245)
Supplement: Figure 6—source data 1. [file elife-44245-fig6-data1.xlsx]

## Sheet: c
Rel		Rela
shCtrl	shRel	shCtrl	shRela
1.208	0.404	0.999	0.364
1.102	0.371	1.008	0.216
1.044	0.347	1.07	0.154

## Sheet: f
shCtrl	shRel	shRela
83.6	70.3	49.2
84.4	59	49.1
82.9	64.7	46.9

## Sheet: h
shCtrl	shRela
61.4	46.5
56.1	44.1
50.7	43
57.9	50
