# Supplementary material for: The quantity of CD40 signaling determines the differentiation of B cells into functionally distinct memory cell subsets
Source: eLife. 2019 Jun 21;8:e44245. doi: 10.7554/eLife.44245 (PMC6636905; doi:10.7554/eLife.44245)
Supplement: Figure 7—source data 1. [file elife-44245-fig7-data1.xlsx]

## Sheet: b
BATF								IRF4
-	BCR hi	BCR lo	CD40 hi	CD40 lo	IL-4	IL-21	BAFF	-	BCR hi	BCR lo	CD40 hi	CD40 lo	IL-4	IL-21	BAFF
59.6	90.1	84	173	99.2	79.7	126	69.8	71.9	116	94.5	158	103	83.7	78.8	87.5
66	88.3	88.1	165	103	77.8	95.7	59.6	74.6	124	106	153	106	79.5	71.9	77
67.5	82.2	84.6	163	98.2	75	92.6	69.2	77.2	112	95.8	150	105	79.9	73.9	82.7

## Sheet: g
CD80			BATF			IRF4
GC	pre-Bmem	Bmem	GC	pre-Bmem	Bmem	GC	pre-Bmem	Bmem
272	817	1801	2182	2748	3688	663	634	1132
250	844	1299	2372	3486	3510	788	902	1147
258	905	1652	2273	3146	3825	705	721	1127
253	903	1562	2220	2787	3645	725	905	1224
250	1026	1514	2104	2936	2983	709	825	1032

## Sheet: j
mock	BATF+IRF4
30.5	43
33.8	47
37.5	44.8
40.3	43.3
28.7	50.4
38.8	42.7
