# Supplementary material for: The quantity of CD40 signaling determines the differentiation of B cells into functionally distinct memory cell subsets
Source: eLife. 2019 Jun 21;8:e44245. doi: 10.7554/eLife.44245 (PMC6636905; doi:10.7554/eLife.44245)
Supplement: Supplementary file 1. [file elife-44245-supp1.xlsx]

## Sheet: ST1
Supplementary Table 1
List of antibodies and reagents used in this study.
Target or material name	Conjugates	Manufacture	Clone or product code	Application	Dilution
BATF	Unconjugated	Cell Signalling	D7C5	Flow	1:100-200
BCL6	APC	Biolegend	7D1	Flow	1:100
CD138	PE, Biotin	Biolegend	281-2	Flow	1:600
CD38	PE/Cy7, PB	Biolegend	90	Flow	1:600
CD40L	PE	Biolegend	MR1	Flow	1:600
CD45.1 (Ly5.1)	BV421	Biolegend	A20	Flow	1:600
CD45.1 (Ly5.1)	FITC	eBioscience	A20	Flow	1:200
CD45.2 (Ly5.2)	PE, BV421	Biolegend	104	Flow	1:600
CD62L	APC	Biolegend	MEL-14	Flow	1:200-600
CD80	PE	Biolegend	16-10A1	Flow	1:300
CD95 (FAS)	Biotin	BD Biosciences	Jo2	Flow	1:600
CXCR5	Biotin	Biolegend	L138D7	Flow	1:100
Efnb1	Unconjugated	R&D SYSTEMS	AF473	Flow	1:100
GL7	Biotin, PerCP-eFluor 710	eBioscience	GL7	Flow	1:120-600
GL7	FITC	Biolegend	GL7	Flow	1:120
Goat IgG	AF647	Jackson ImmunoReserch	705-605-147	Flow	1:2000
IgG1	FITC, BV421	BD Biosciences	A85-1	Flow	1:200-600
IgM	eFluor 450, FITC	eBioscience	II/41	Flow	1:200-600
IRF4	PE	eBioscience	3E4	Flow	1:2000
NP14-BSA	APC, Biotin	(In house; Fukao et al., 2014)	−	Flow	1:600
NPmed	APC	(In house; Tashiro et al., 2015)	−	Flow	1:600
PD-1	PE/Cy7	Biolegend	RMP1-30	Flow	1:200
PD-L2	Biotin	Biolegend	TY25	Flow	1:300
PD-L2	BV510	BD Biosciences	TY25	Flow	1:300
Rabbit IgG	APC	Cell Signalling	4414S	Flow	1:2000
SA	BV421, BV510	Biolegend	405226, 405233	Flow	1:200-600
CD19	APC/Cy7, Biotin	Biolegend	6D5	Flow, Purification	1:200-600
CD4	FITC, Biotin	Biolegend	GK1.5	Flow, Purification	1:200-500
GL7	BV421, FITC	BD Biosciences	GL7	Flow, Purification	1:100-600
TER-119	PerCP/Cy5.5, Biotin	Biolegend	TER-119	Flow, Purification	1:200-600
CD11b	Biotin	Biolegend	M1/70	Purification	1:200
CD43	Biotin	BD pharmingen	S7	Purification	1:173
CD49b	Biotin	Biolegend	DX5	Purification	1:500
CD8a	Biotin	Biolegend	53-6.7	Purification	1:200-500
Gr-1	Biotin	Biolegend	RB6-8C5	Purification	1:200
H-2Kd	Biotin	Biolegend	SF1-1.1	Purification	1:100
IgD	Biotin	Biolegend	11-26c.2a	Purification	1:100
IgM	Biotin	Biolegend	RMM-1	Purification	1:100
Lamin B	Unconjugated	Santa Cruz biotechnology	B-10	Immunobltting	1:1000
mouse κ light chain	HRP	Southen Biotech	1050-05	Immunobltting	1:5000
p65/RelA	Unconjugated	Cell Signalling	D14E12	Immunobltting	1:2000
Rabbit IgG	HRP	Jackson ImmunoReserch	711-035-152	Immunobltting	1:5000
Tubulin	Unconjugated	Sigma	T-6074	Immunobltting	1:1000
Supplementary Table 2
List of primers for qRT-PCR
Target	sence or antisence	sequence (5'-3')
Gapdh	sence	GGAGAAACCTGCCAAGTATGA
	antisence	CCCTGTTGCTGTAGCCGTATT
Rel	sence	TTGCAGAGATGGATACTATGAAGC
	antisence	CACCGAATACCCAAATTTTGAA
Rela	sence	CCCAGACCGCAGTATCCAT
	antisence	GCTCCAGGTCTCGCTTCTT
List of target sequences of shRNA
Target	Taget sequence (5'-3')
shCtrl (shLuciferase)	GTGCGTTGCTAGTACCAA
shCd40lg	GAATTACAAGCTGGTGCTTCT
shRel	GCGGGAACACTTTCCTCTAAT
shRela	GGACCTATGAGACCTTCAAGA
