# Supplementary figures and images for: The quantity of CD40 signaling determines the differentiation of B cells into functionally distinct memory cell subsets
Source: eLife journal article supplement (doi:10.7554/elife.44245), 2019-06-21

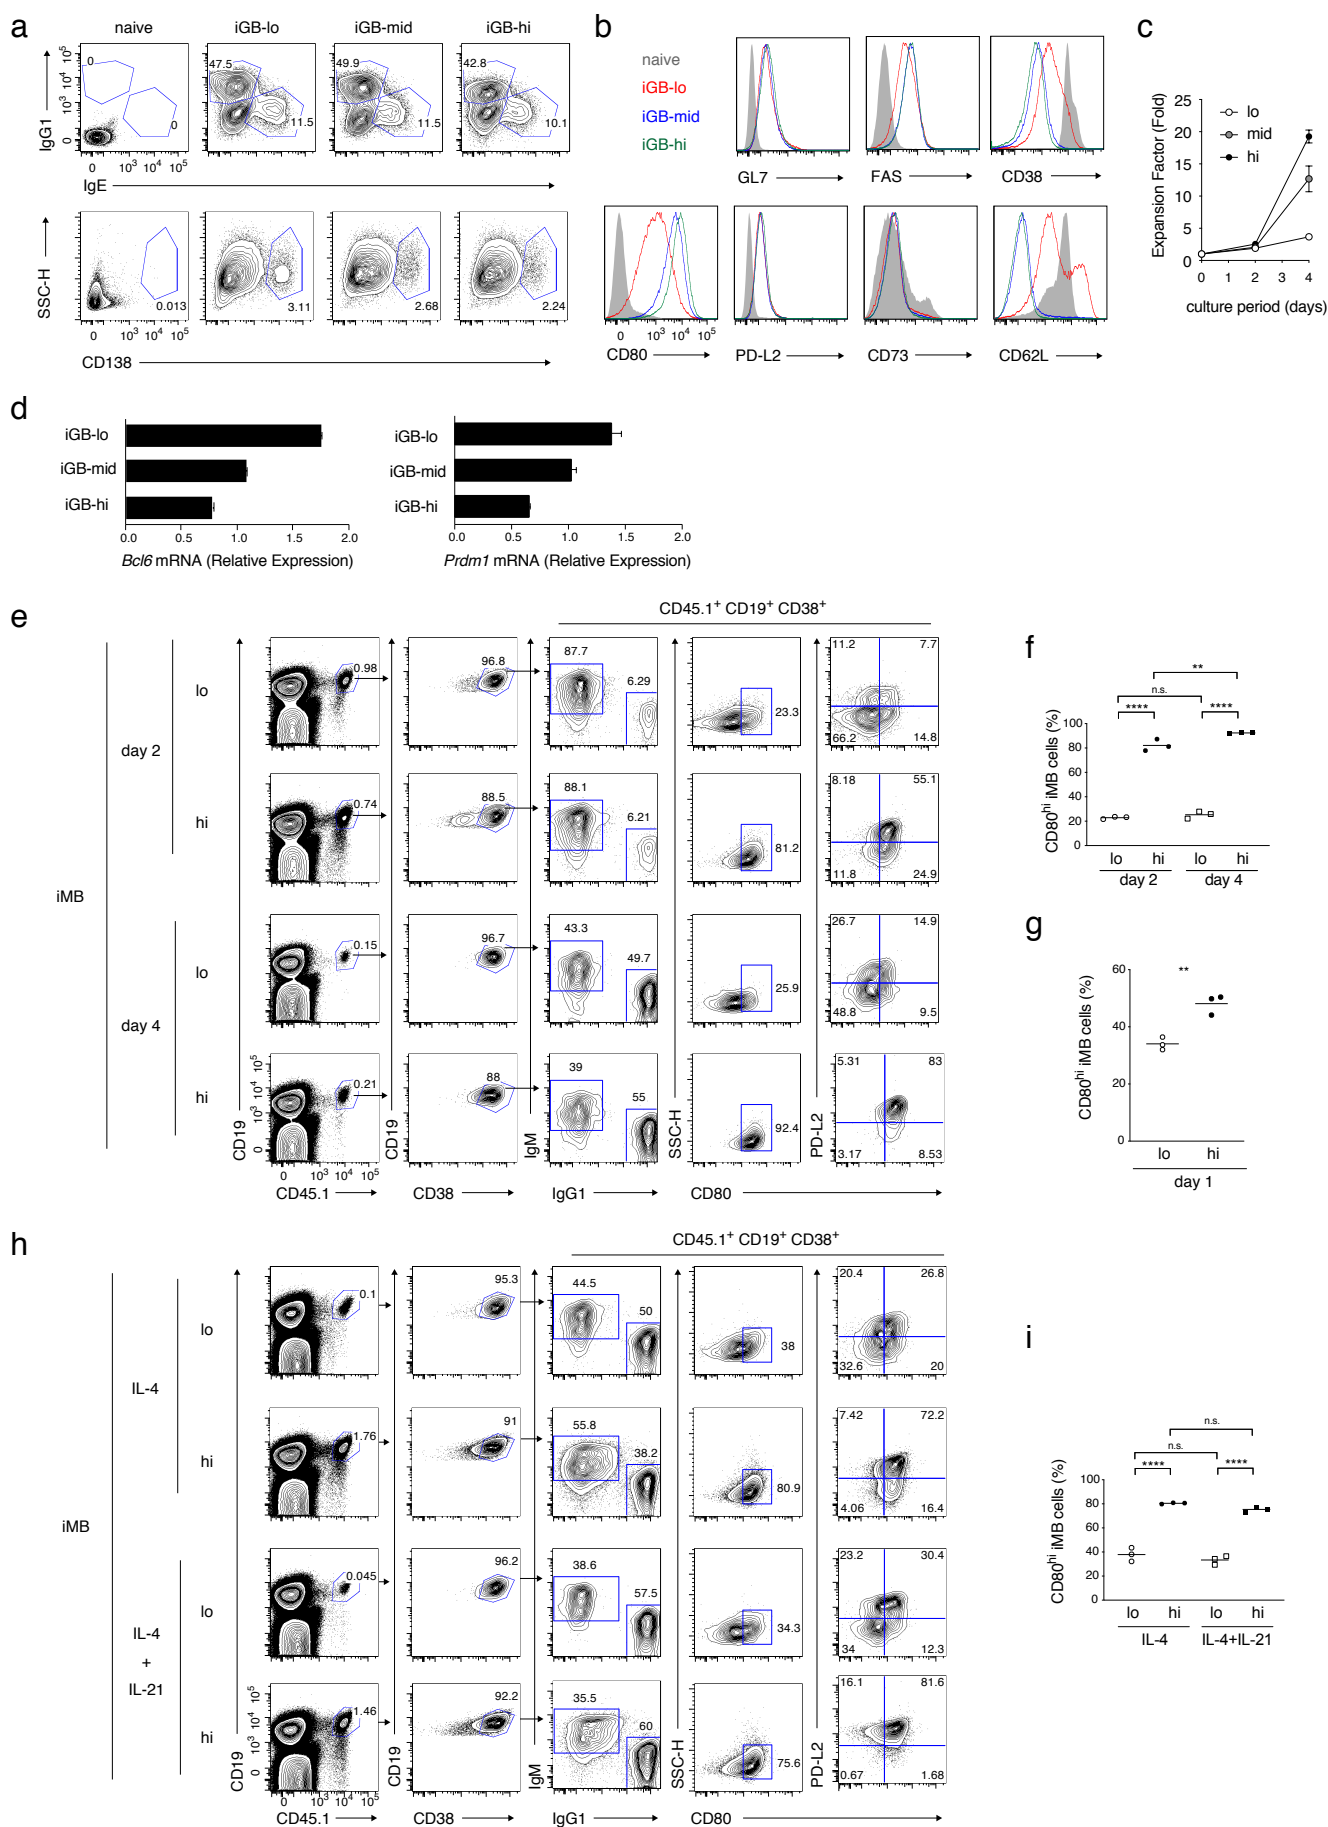

Supplement: supp [file elife-44245-supp-v1.zip]

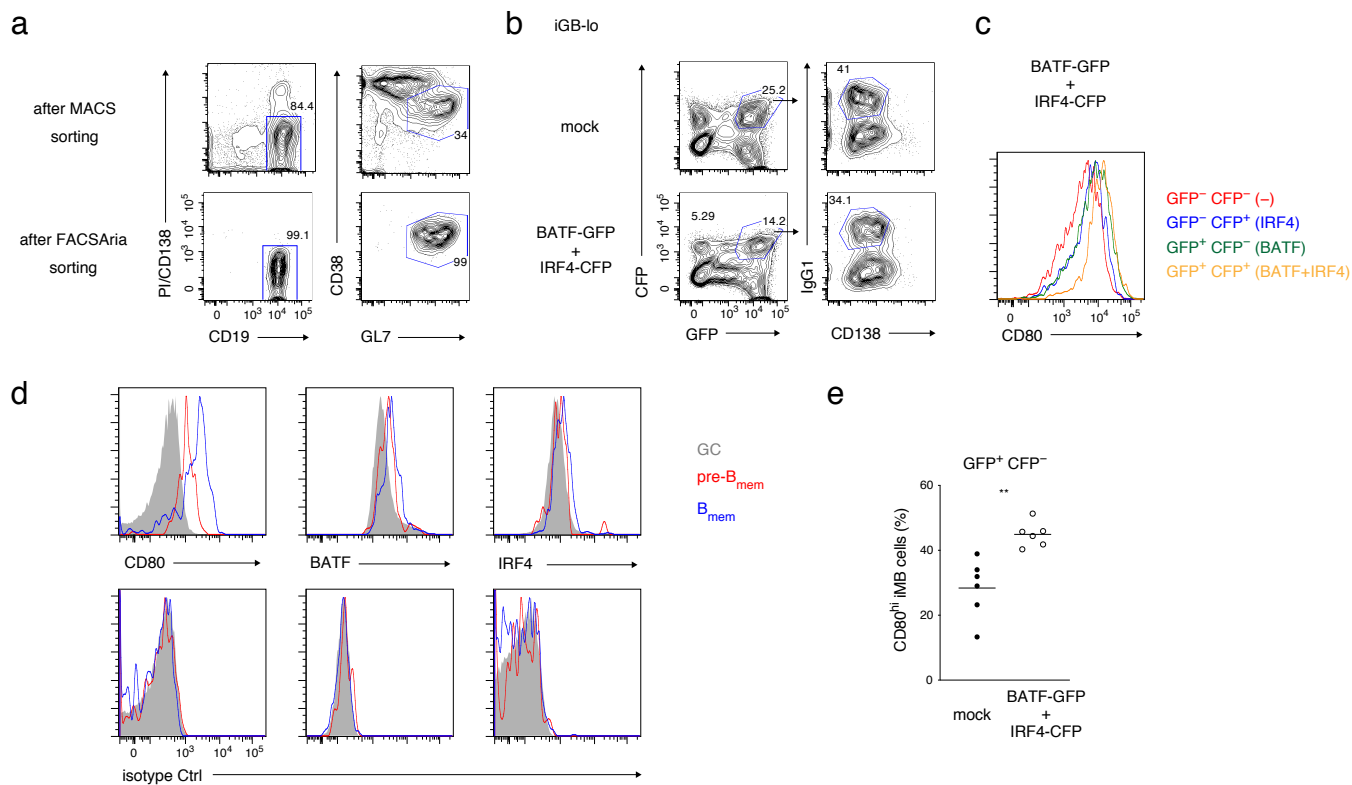

Supplement: supp [file elife-44245-supp-v1.zip]

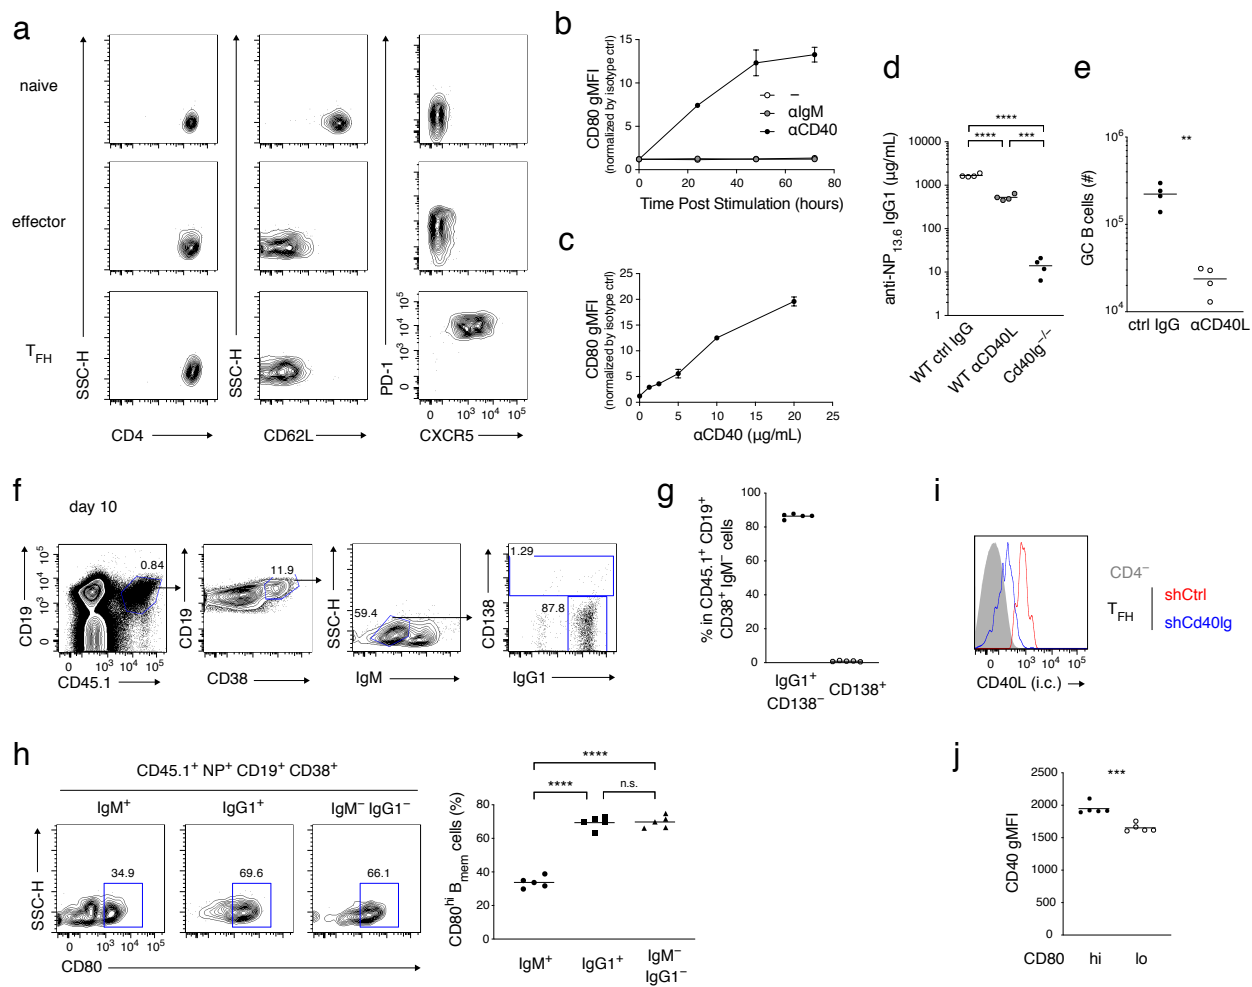

Supplement: supp [file elife-44245-supp-v1.zip]

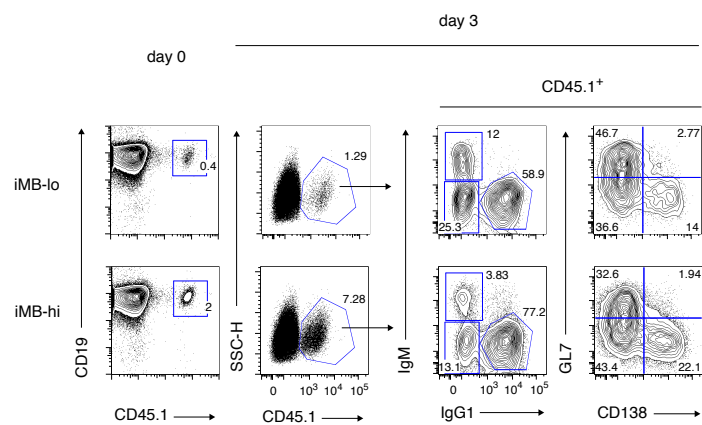

Supplement: supp [file elife-44245-supp-v1.zip]

**a**

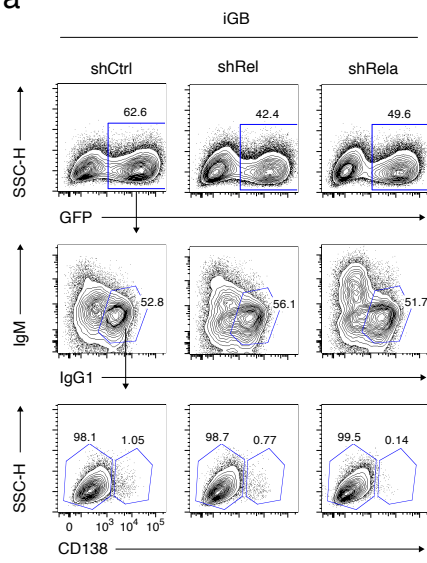

**b**

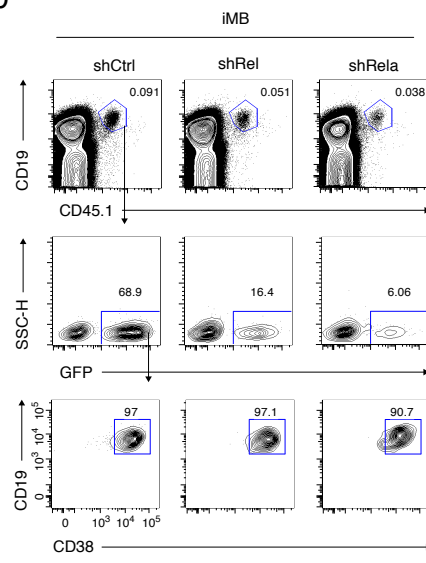

**c**

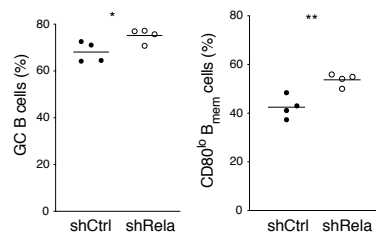

Supplement: supp [file elife-44245-supp-v1.zip]

**a**

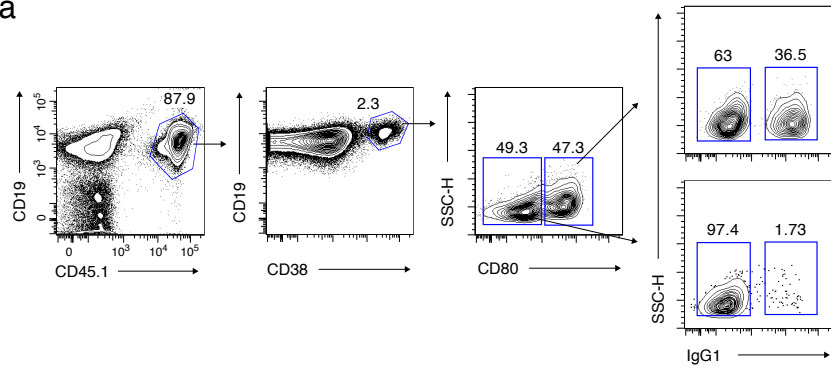

**b**

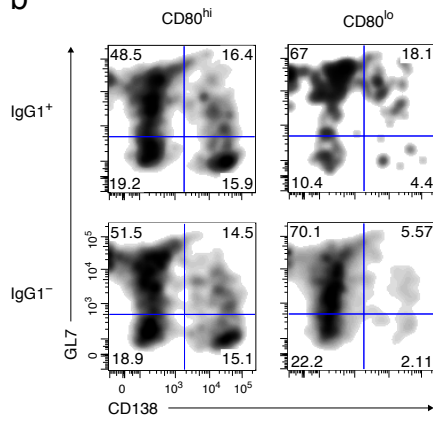

Supplement: supp [file elife-44245-supp-v1.zip]

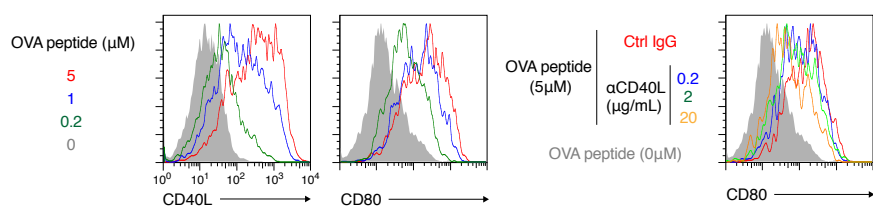

Supplement: supp [file elife-44245-supp-v1.zip]
